# Supplementary material for: Does recovery from submaximal exercise predict response to cardiac resynchronisation therapy?
Source: PubMed Central journal article supplement — Open Heart. 2022 Nov 14;9(2):e002047. doi: 10.1136/openhrt-2022-002047 (PMC9664270; doi:10.1136/openhrt-2022-002047), 2022-11-14

### Graphical Abstract

Derangements in tissue oxygenation (O<sub>2</sub> delivery) and local metabolic capacity (O<sub>2</sub> utilisation) limit the 'rate change' of oxygen uptake (VO<sub>2</sub>) during onset and recovery from submaximal exercise (**red arrows, panel A**). Respiratory gas analysis can objectively reveal patients with prolonged VO<sub>2</sub> kinetics (**red line, panel B**), adapted from Kemps *et al.*<sup>11</sup> Before CRT, a prolonged duration to increase VO<sub>2</sub> to peak levels and normalise to baseline levels ( $\tau$ VO<sub>2</sub> onset and recovery, respectively) are associated with non-response to CRT (**panel C**). Legend: CRT, cardiac resynchronization therapy; LVESV, left ventricular end-systolic volume.

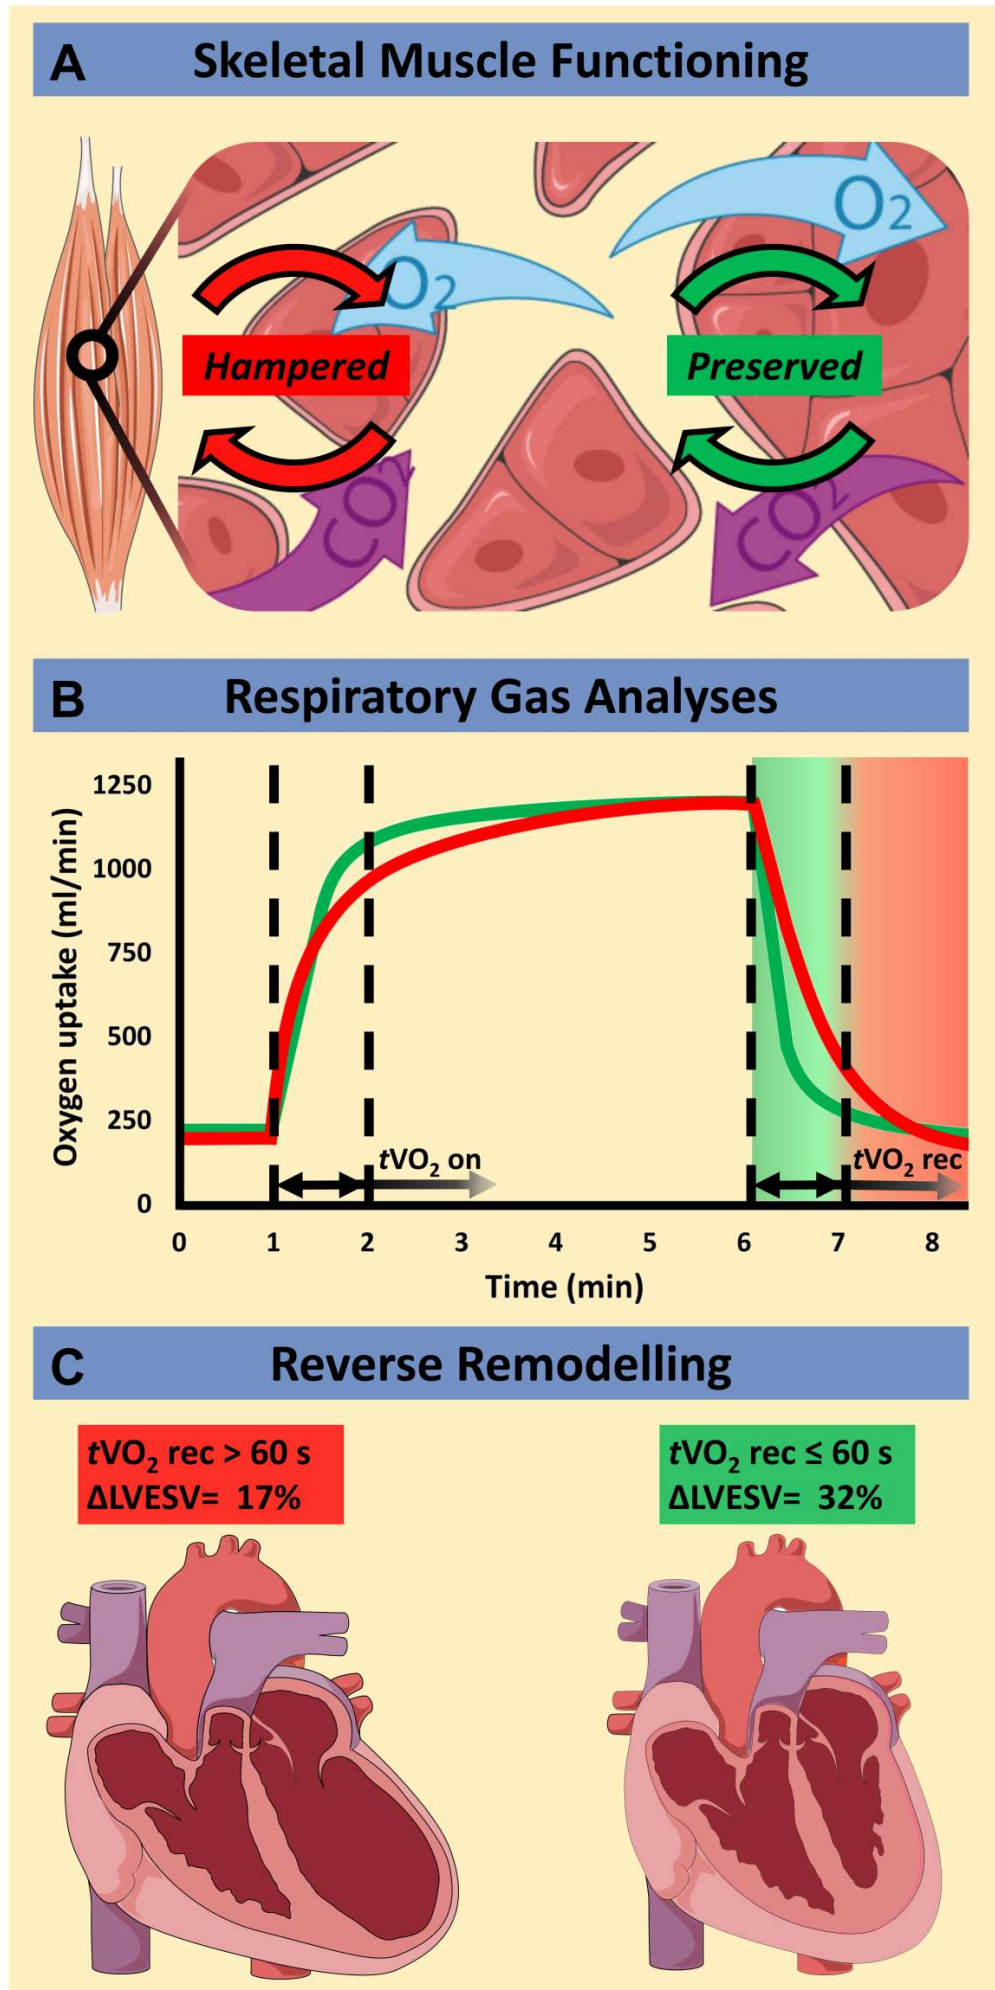

Supplement: openhrt-2022-002047supp002.pdf [file openhrt-2022-002047supp002.pdf]
